# Supplementary material for: The Effect of the COVID-19 Pandemic on Pulmonary Tuberculosis Control in the Selected Upazila Health Complexes of Dhaka Division, Bangladesh
Source: MDPI journal article supplement (doi:10.3390/tropicalmed7110385), 2022-11-17
Supplement: s1 [file s1]

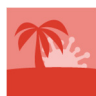

# Supplementary Materials for The Effect of the COVID-19 Pandemic on Pulmonary Tuberculosis Control in the Selected Upazila Health Complexes of Dhaka Division, Bangladesh

## Personal Information

Facility Name

Facility address

## Document Review Checklist

DOTS corner, Upazila Health Complex

Reviewed Year: 2020–2021

|                | Presumptive TB<br>Patients' Notifications | Sputum Microscopy<br>Tests | Patients Tested<br>Positive by Sputum<br>Microscopy | Registered Adult PTB<br>Cases |
|----------------|-------------------------------------------|----------------------------|-----------------------------------------------------|-------------------------------|
| March 2019     |                                           |                            |                                                     |                               |
| April 2019     |                                           |                            |                                                     |                               |
| May 2019       |                                           |                            |                                                     |                               |
| June 2019      |                                           |                            |                                                     |                               |
| July 2019      |                                           |                            |                                                     |                               |
| August 2019    |                                           |                            |                                                     |                               |
| September 2019 |                                           |                            |                                                     |                               |
| October 2019   |                                           |                            |                                                     |                               |
| November 2019  |                                           |                            |                                                     |                               |
| December 2019  |                                           |                            |                                                     |                               |
| January 2020   |                                           |                            |                                                     |                               |
| February 2020  |                                           |                            |                                                     |                               |
| March 2020     |                                           |                            |                                                     |                               |
| April 2020     |                                           |                            |                                                     |                               |
| May 2020       |                                           |                            |                                                     |                               |
| June 2020      |                                           |                            |                                                     |                               |
| July 2020      |                                           |                            |                                                     |                               |
| August 2020    |                                           |                            |                                                     |                               |
| September 2020 |                                           |                            |                                                     |                               |
| October 2020   |                                           |                            |                                                     |                               |
| November 2020  |                                           |                            |                                                     |                               |
| December 2020  |                                           |                            |                                                     |                               |
| January 2021   |                                           |                            |                                                     |                               |
| February 2021  |                                           |                            |                                                     |                               |

### Personal Information

Name of the respondent

Facility Name

Facility address

Respondent Mobile number

Time of interview

### Questionnaire for the Health Care Providers Associated with PTB Control

| Question                                                      | Coding                                                                                                                                                                                                     |
|---------------------------------------------------------------|------------------------------------------------------------------------------------------------------------------------------------------------------------------------------------------------------------|
| Age in Years                                                  |                                                                                                                                                                                                            |
| Gender                                                        | 1 = Male<br>2 = Female                                                                                                                                                                                     |
| Designation                                                   | 1 = Medical officer<br>2 =DOTS service provider<br>3 = Laboratory staffs<br>4 = TLCA<br>5 = MODC                                                                                                           |
| How many months duration of experience in TB control program? | In months                                                                                                                                                                                                  |
| How many persons usually worked in the TB control program?    |                                                                                                                                                                                                            |
| Had they ever been infected with COVID-19?                    | 1 = Yes<br>2 = No                                                                                                                                                                                          |
| If yes, how many days you took leave due to COVID-19?         | -----                                                                                                                                                                                                      |
| Have you faced any challenges due to the COVID-19 pandemic?   | 1 = Yes<br>2 = No                                                                                                                                                                                          |
| If Yes, what were the challenges?                             | 1 = Lack of manpower<br>2 = Increased workload<br>3 = Interruption in the regular follow-up of the TB patient<br>4 = Interruption in the TB diagnosis<br>5 = Interruption in the drug supply<br>6 = Others |
| Was there any adaptation in the DOTs clinic due to COVID-19?  | 1 = Yes<br>2 = No                                                                                                                                                                                          |
| If yes, what was the adaptation?                              | 1 = Behavioral adaptation<br>2 = Management of TB patients<br>3 = TB screening management<br>4 =TB diagnosis<br>5 = Follow-up                                                                              |
| Did you perform contact screening regularly?                  | 1 = Yes<br>2 = No                                                                                                                                                                                          |
| If yes, what were the barriers?                               | 1 = Lack of workforce<br>2 = Lack of patient compliance                                                                                                                                                    |
| Have you faced any barriers in the diagnosis of PTB?          | 1 = Yes<br>2 = No                                                                                                                                                                                          |
| If yes, what are they?                                        | 1 = Interruption in the sample collection<br>2 = Reduced visits of the patient to the facility due to COVID-19 panic<br>3 = Interruption in the performing test<br>4 = Interruption in the report delivery |
| Have you faced any barriers in the treatment of TB?           | 1 = Yes                                                                                                                                                                                                    |

|                                                     |                                                                                                                                                       |
|-----------------------------------------------------|-------------------------------------------------------------------------------------------------------------------------------------------------------|
|                                                     | 2 = No                                                                                                                                                |
| If yes, what are they?                              | 1 = Lack of patient compliance<br>2 = Reduced number of visits of the patient to the facility due to COVID-19 panic<br>3 = Co-infection with COVID-19 |
| Have you faced any barriers in the follow-up of TB? | 1 = Yes<br>2 = No                                                                                                                                     |
| If yes, what are they?                              | 1 = Follow-up visit cancellation<br>2 = Reduced number of visits<br>3 = Others                                                                        |

#### Questionnaire for the PTB Patients

| Question                                                                               | Coding                                                                                                                                                                                                                                                                 |
|----------------------------------------------------------------------------------------|------------------------------------------------------------------------------------------------------------------------------------------------------------------------------------------------------------------------------------------------------------------------|
| Age in Years                                                                           |                                                                                                                                                                                                                                                                        |
| Gender                                                                                 | 1 = Male<br>2 = Female                                                                                                                                                                                                                                                 |
| Residence                                                                              | 1 = Urban<br>2 = Rural                                                                                                                                                                                                                                                 |
| Type of family                                                                         | 1 = Nuclear<br>2 = Joint                                                                                                                                                                                                                                               |
| Occupation                                                                             | 1 = Homemaker<br>2 = Daily wager<br>3 = Employee<br>4 = Laborer<br>5 = Business<br>6 = Retired<br>7 = Other<br>8 = Student                                                                                                                                             |
| Have you faced any barriers to coming to seek care at the DOTS corner since COVID- 19? | 1= Yes<br>2= No                                                                                                                                                                                                                                                        |
| If yes, what were the barriers for you since COVID-19?                                 | 1 = Transport shortage/transportation-related difficulties<br>2 = Fear of getting infected with SARS-COV2 infection<br>3 = Reduced income<br>4 = Long waiting times to get a consultation<br>5 = Shortage of DOTs providers                                            |
| Are you dissatisfied with the treatment you are receiving during the pandemic?         | 1 = Yes<br>2 = No                                                                                                                                                                                                                                                      |
| If yes, what were the reasons for the dissatisfaction                                  | 1 = Overwrowding in the healthcare facility than usual<br>2 = Unable to get a consultation in time<br>3 = Long waiting times to do any investigation<br>4 = Insufficinet drug supply<br>5 = Reduced the number of follow up<br>6 = Shortage in the diagnostic services |
